# Supplementary material
Source: MDPI journal article supplement (https://www.mdpi.com/2073-4395/13/1/229)
Supplement: s1 [file s1]

**Table S1.** List of the oligonucleotides used in this study.

| Name                                     | Primer sequence (5'-3')                                    | Gene annotation or Target | Gene ID           | Reference                          |
|------------------------------------------|------------------------------------------------------------|---------------------------|-------------------|------------------------------------|
| <i>VvCOX_F</i><br><i>VvCOX_R</i>         | CGTCGCATTCCAGATTATCCA<br>CAACTACGGATATATAA-<br>GAGCCAAAAGT | Cytochrome oxidase        | VIT not assigned  | Nerva et al., 2022 <sup>1</sup>    |
| <i>VvUBI_F</i><br><i>VvUBI_R</i>         | TCTGAGGTTCGTGGTGGTA<br>AGGCGTGCATAACATTTGCG                | Ubiquitin                 | VIT_16s0098g00580 | Chitarra et al., 2017 <sup>2</sup> |
| <i>VvHNT1_F</i><br><i>VvHNT1_R</i>       | AACCACAGACGCCACAAGA<br>CCACCCAGAAGAACCCGCAA                | Nitrate transporter 3.1   | VIT_17s0000g09470 | This study                         |
| <i>VvNRT1.3_F</i><br><i>VvNRT1.3_R</i>   | TCAGCAGCAAAATCAGCAAC<br>TGCTAAGAAACCGGCTAGGA               | Nitrate transporter 1.3   | VIT_12s0059g01240 | Zanin et al., 2022 <sup>3</sup>    |
| <i>VvNRT2.4A_F</i><br><i>VvNRT2.4A_R</i> | CCTCCACCTTCAAAGGA<br>CATGGGATGGTGTAGAGTTGG                 | Nitrate transporter 2.4A  | VIT_06s0061g00320 | Zanin et al., 2022 <sup>3</sup>    |

<sup>1</sup>Nerva, L., Guaschino, M., Pagliarini, C., De Rosso, M., Lovisolo, C., & Chitarra, W. (2022). Spray-induced gene silencing targeting a glutathione S-transferase gene improves resilience to drought in grapevine. *Plant, Cell & Environment*, 45(2), 347-361; <sup>2</sup>Balestrini, R., Salvioli, A., Dal Molin, A., Novero, M., Gabelli, G., Paparelli, E., ... & Bonfante, P. (2017). Impact of an arbuscular mycorrhizal fungus versus a mixed microbial inoculum on the transcriptome reprogramming of grapevine roots. *Mycorrhiza*, 27(5), 417-430; <sup>3</sup>Zanin, L.; Nerva, L.; Alessandrini, M.; Tomasi, D.; Pinton, R.; Lucchetta, M.; Chitarra, W.; Gaiotti, F. Effects of the Fractionation of the Nitrogen Fertilization on Root Nitrate Uptake and Vine Agronomic Performance in Pinot Gris Grapevines in a Temperate Climate. *J. Soil Sci. Plant Nutr.* **2022**, 22, 4996–5008.

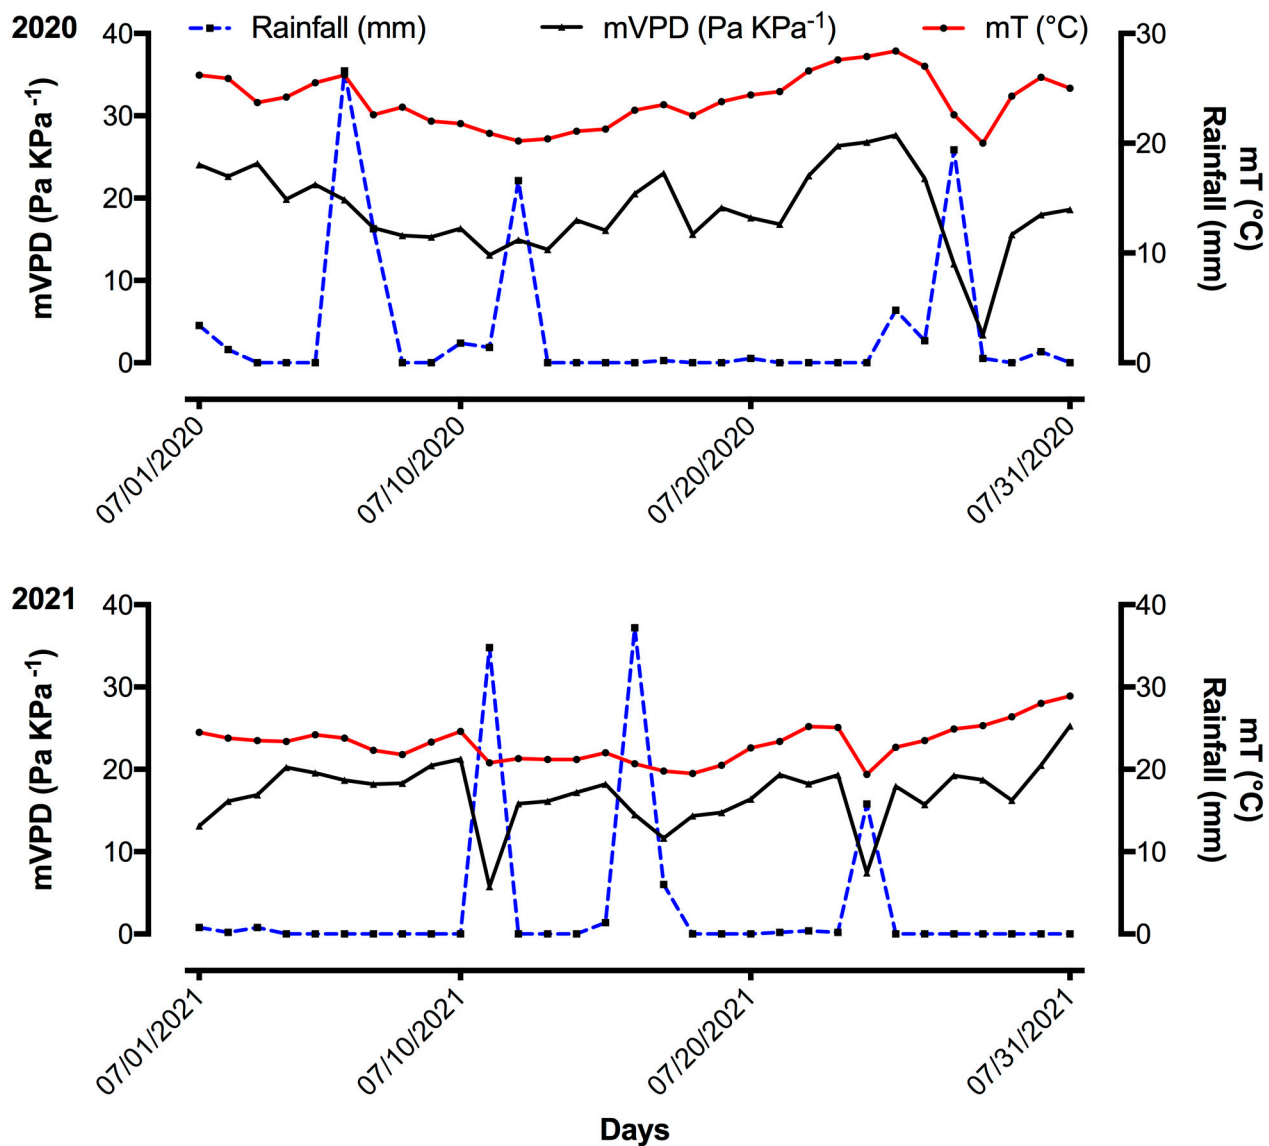

Figure S1. Climatic data recorded during the experimental trial (July 2020 and 2021). Average daily rainfall (blue dashed lines), average daily air temperature (mT, red lines) and average Vapor Pressure Deficit (mVPD, black lines) retrieved from the weather station during July 2020 and 2021.
